# Supplementary material
Source: ML conference proceedings conference paper supplement (https://openaccess.thecvf.com/content/CVPR2025/html/Zhang_Weakly_Supervised_Contrastive_CVPR_2025_paper.html)
Supplement: Supplementary file 1 [file Zhang_Weakly_Supervised_Contrastive_CVPR_2025_supplemental.pdf]

# Weakly Supervised Contrastive Adversarial Training for Learning Robust Features from Semi-supervised Data

## Supplementary Material

### A. Proofs of Theorems

#### A.1. Useful Lemmas

**Lemma 1.** Let  $z = f(x)$ ,  $z_1 = f(x_1)$  and  $\bar{s}(z) = -\frac{1}{|\mathcal{N}_x^+|} \sum_{x_p \in \mathcal{N}_x^+} \log \frac{\exp(s(z, z_p))}{\sum_{x_n \in \mathcal{D}^*} \exp(s(z, z_n))}$ . If  $\Delta(z, z_1) = |\bar{s}(z) - \bar{s}(z_1)|$  is valid when  $x_1 \in \mathcal{B}_\epsilon(x)$ ,  $\Delta(\cdot, \cdot)$  is a distance metric.

*Proof of Lemma 1.* It is obvious that for any  $x$ ,  $\Delta(z, z) = 0$ . And for any  $x$  and  $x_1 \in \mathcal{B}_\epsilon(x)$  the symmetry and non-negativity are clearly satisfied by  $\Delta(z, z_1)$ . We only need to justify that  $\Delta(\cdot, \cdot)$  satisfies the triangle inequality. For any  $x$ ,  $x_1$  and  $x_2$ , since we have

$$\begin{aligned} & \Delta(z, z_1) + \Delta(z, z_2) \\ &= \Delta(z_1, z_2) + \Delta(z, z_2) - \Delta(z_1, z_2) + \Delta(z, z_1) \\ &= |\bar{s}(z_1) - \bar{s}(z_2)| + |\bar{s}(z) - \bar{s}(z_2)| - \Delta(z_1, z_2) + \Delta(z, z_1) \\ &\geq |\bar{s}(z_1) - 2\bar{s}(z_2) + \bar{s}(z)| - \Delta(z_1, z_2) + \Delta(z, z_1) \\ &= |2\bar{s}(z_1) - 2\bar{s}(z_2) + \bar{s}(z) - \bar{s}(z_1)| - \Delta(z_1, z_2) + \Delta(z, z_1) \\ &\geq |2\bar{s}(z_1) - 2\bar{s}(z_2)| - |\bar{s}(z) - \bar{s}(z_1)| - \Delta(z_1, z_2) + \Delta(z, z_1) \\ &= 2\Delta(z_1, z_2) - \Delta(z, z_1) - \Delta(z_1, z_2) + \Delta(z, z_1) \\ &= \Delta(z_1, z_2), \end{aligned}$$

i.e., the triangle inequality  $\Delta(z, z_1) + \Delta(z, z_2) \geq \Delta(z_1, z_2)$  always holds. Therefore,  $\Delta(\cdot, \cdot)$  is a distance metric.  $\square$

**Lemma 2.**  $|l_{\text{con}}(z', z) - l_{\text{con}}(z, z)| = \Delta(z', z)$

*Proof of Lemma 2.* According to Eq. (7),

$$\begin{aligned} & l_{\text{con}}(z', z) - l_{\text{con}}(z, z) \\ &= -\frac{1}{|\mathcal{N}_x^+|} \sum_{x_p \in \mathcal{N}_x^+} \log \frac{\exp(s(z', z_p))}{\sum_{x_n \in \mathcal{D}^*} \exp(s(z', z_n))} \\ &\quad + \frac{1}{|\mathcal{N}_x^+|} \sum_{x_p \in \mathcal{N}_x^+} \log \frac{\exp(s(z, z_p))}{\sum_{x_n \in \mathcal{D}^*} \exp(s(z, z_n))} \\ &= \bar{s}(z') - \bar{s}(z). \end{aligned}$$

Therefore,  $|l_{\text{con}}(z, z) - l_{\text{con}}(z', z)| = \Delta(z', z)$ .  $\square$

#### A.2. Detailed Proofs

*Proof of Theorem 1.* By the LogSumExp operation, i.e.,  $\log(e^{x_1} + e^{x_2} + \dots + e^{x_n}) \approx \max\{x_1, x_2, \dots, x_n\}$ , we can

transform the contrastive loss in Eq. (7) to

$$\begin{aligned} & l_{\text{con}}(z', z) \\ &= \frac{1}{|\mathcal{N}_x^+|} \sum_{x_p \in \mathcal{N}_x^+} \log \frac{\sum_{x_n \in \mathcal{D}^*} e^{s(z', z_n)}}{e^{s(z', z_p)}} \\ &= \frac{1}{|\mathcal{N}_x^+|} \sum_{x_p \in \mathcal{N}_x^+} \log \left( e^0 + \sum_{x_n \in \mathcal{D}, x_n \neq x_p} e^{s(z', z_n) - s(z', z_p)} \right) \\ &\approx \frac{1}{|\mathcal{N}_x^+|} \sum_{x_p \in \mathcal{N}_x^+} \max\{0, \{s(z', z_n) - s(z', z_p)\}_{x_n \in \mathcal{D}, x_n \neq x_p}\}, \end{aligned}$$

from which we can see that maximizing  $l_{\text{con}}(z', z)$  is approximately maximizing the last line.  $\square$

*Proof of Theorem 2.* 1) According to Hoeffding's Inequality [11], with probability at least  $1 - \delta$  the following inequality holds:

$$\begin{aligned} & \mathbb{E}_{P_{X,Y}}[l_{\text{nat}}(X, Y)] - \frac{1}{|\mathcal{D}^*|} \sum_{(x,y) \in \mathcal{D}^*} l_{\text{nat}}(x, y) \\ &\leq \mathbb{E}_{P_{X,Y}}[l_{\text{nat}}(X, Y)] - \frac{1}{|\mathcal{D}_l|} \sum_{(x,y) \in \mathcal{D}_l} l_{\text{nat}}(x, y) \\ &\leq l_m \sqrt{\frac{\log \frac{1}{\delta}}{2|\mathcal{D}_l|}}, \end{aligned}$$

where the second line holds because existing works [7, 34] have theoretically proven that pseudo-labeled data generated by self-training can decrease the generalization gap.

Then according to the Definition 1,

$$\begin{aligned} \rho_{l_{\text{nat}}} &= \inf_g \mathbb{E}_{P_{X,Y}}[l_{\text{nat}}(X, Y)] \\ &\leq A_1 + l_m \sqrt{\frac{\log \frac{1}{\delta}}{2|\mathcal{D}_l|}} \end{aligned}$$

with probability at least  $1 - \delta$ .

2) Again according to Hoeffding's Inequality, with probability at least  $1 - \delta$  the following inequality holds:

$$\mathbb{E}_{P_X}[\Delta(f(X'), f(X))] - \frac{1}{n} \sum_{x \in \mathcal{D}} \Delta(x', x) \leq \Delta_m \sqrt{\frac{\log \frac{1}{\delta}}{2|\mathcal{D}|}},$$

where  $\Delta_m$  is the supremum of the distance  $\Delta(\cdot, \cdot)$  over  $\{(z', z) | x \sim P_X \wedge x' \in \mathcal{B}_\epsilon(x) \wedge z = f(x) \wedge z' = f(x')\}$ .

And thus we have the following inequalities:

$$\begin{aligned}
& \mathbb{E}_{P_X} \left[ \sup_{X' \in \mathcal{B}_\epsilon(X)} \Delta(f(X'), f(X)) \right] - \Delta_m \sqrt{\frac{\log \frac{1}{\delta}}{2|D|}} \\
& \leq \frac{1}{|D|} \sum_{x \in \mathcal{D}} \sup_{x' \in \mathcal{B}_\epsilon(x)} \Delta(z', z) \\
& \leq \frac{1}{|D|} \sum_{x \in \mathcal{D}} \sup_{x' \in \mathcal{B}_\epsilon(x)} \{l_{\text{con}}(z', z) - l_{\text{con}}(z, z)\} \\
& \leq \frac{1}{\beta|D|} \sum_{x \in \mathcal{D}} \sup_{x' \in \mathcal{B}_\epsilon(x)} \{ \text{KL}(C(x) \| C(x')) \\
& \quad + \beta(l_{\text{con}}(z', z) - l_{\text{con}}(z, z)) \} \\
& = \frac{1}{\beta|D|} \sum_{x \in \mathcal{D}} \sup_{x' \in \mathcal{B}_\epsilon(x)} l_{\text{adv}}(x', x) \\
& = \frac{2}{\beta} A_2,
\end{aligned}$$

where the first inequality holds with probability at least  $1 - \delta$ . Then according to Definition 1, we can get that

$$\begin{aligned}
\gamma_\Delta &= \mathbb{E}_{P_X} \left[ \sup_{X' \in \mathcal{B}_\epsilon(X)} \Delta(f(X'), f(X)) \right] \\
&\leq \frac{2}{\beta} A_2 + \Delta_m \sqrt{\frac{\log \frac{1}{\delta}}{2|D|}}.
\end{aligned}$$

Therefore, feature  $f$  captured by the target model  $C = g \circ f$  trained by WSCAT is  $\rho_{\text{nat}} - \gamma_\Delta$ -robust, where  $\rho_{\text{nat}} \leq l_m \sqrt{\frac{\log \frac{1}{\delta}}{2|D|}}$  with probability at least  $1 - \delta$ , and  $\gamma_\Delta \leq \frac{2}{\beta} A_2 + \Delta_m \sqrt{\frac{\log \frac{1}{\delta}}{2|D|}}$  with probability at least  $1 - \delta$ .  $\square$

## B. Additional Experimental Results

### B.1. Performance Comparison (RQ1)

The performance of WSCAT-sup and TRADES under fully-supervised setting across various model architectures is shown in Tab. 1.

### B.2. Ablation Study (RQ3)

The performance of WSCAT and WSCAT's different variants is shown in Tabs. 2 to 4.

### B.3. Training Time (RQ5)

To show WSCAT does not excessively increases the training time than existing semi-supervised AT methods, we compare WSCAT's epoch time with that of RST, which is an efficient semi-supervised AT method [43]. The result is shown in Tab. 5, from which one can observe that WSCAT does not bring additional training time cost overall. The result is reasonable since during a batch of the training, the loss defined in Eq. (7) can be calculated just based on points in that batch instead of the entire dataset.

Table 1. Performance of models trained by Standard, TRADES and WSCAT-sup (a variant of our WSCAT that uses only labeled data) under fully-supervised setting.

| Dataset (Model)     | Method    | Nat.  | FGSM  | PGD   | CW    | AA    | Mean  | NRF   |
|---------------------|-----------|-------|-------|-------|-------|-------|-------|-------|
| CIFAR10 (ResNet50)  | Standard  | 95.15 | 42.37 | 0.02  | 0.01  | 0.00  | 0.00  | 0.00  |
|                     | TRADES    | 80.34 | 56.05 | 51.74 | 49.27 | 47.99 | 55.10 | 43.92 |
|                     | WSCAT-sup | 82.37 | 59.84 | 57.84 | 52.50 | 51.41 | 59.07 | 45.86 |
| CIFAR10 (ResNet152) | Standard  | 95.26 | 49.42 | 0.01  | 0.00  | 0.00  | 0.00  | 0.00  |
|                     | TRADES    | 81.52 | 56.56 | 51.55 | 49.96 | 48.15 | 55.48 | 57.01 |
|                     | WSCAT-sup | 80.98 | 59.92 | 58.46 | 52.89 | 52.09 | 59.35 | 58.56 |
| CIFAR10 (WRN28-10)  | Standard  | 96.23 | 43.34 | 0.01  | 0.02  | 0.00  | 0.00  | 0.00  |
|                     | TRADES    | 84.65 | 60.92 | 56.34 | 54.12 | 52.85 | 59.97 | 50.44 |
|                     | WSCAT-sup | 84.18 | 61.42 | 59.72 | 54.02 | 52.91 | 60.74 | 55.12 |
| CIFAR100 (WRN28-10) | Standard  | 78.62 | 16.27 | 0.34  | 0.09  | 0.00  | 0.00  | -     |
|                     | TRADES    | 58.69 | 33.74 | 30.77 | 28.31 | 27.02 | 33.00 | -     |
|                     | WSCAT-sup | 59.71 | 34.61 | 32.63 | 28.80 | 27.46 | 33.92 | -     |

Table 2. Performance of different variants on **CIFAR10**.

| Methods | WSCAT            | WSCAT-fixed      | WSCAT-self       | WSCAT-std        |
|---------|------------------|------------------|------------------|------------------|
| Natural | 80.93 $\pm$ 0.14 | 79.04 $\pm$ 0.45 | 80.72 $\pm$ 0.12 | 76.65 $\pm$ 0.30 |
| FGSM    | 59.62 $\pm$ 0.16 | 57.56 $\pm$ 0.22 | 58.71 $\pm$ 0.25 | 55.33 $\pm$ 0.37 |
| PGD     | 58.52 $\pm$ 0.22 | 54.55 $\pm$ 0.17 | 54.58 $\pm$ 0.43 | 53.75 $\pm$ 0.18 |
| CW      | 53.15 $\pm$ 0.08 | 51.66 $\pm$ 0.03 | 52.20 $\pm$ 0.34 | 48.68 $\pm$ 0.10 |
| AA      | 52.23 $\pm$ 0.06 | 50.77 $\pm$ 0.06 | 51.20 $\pm$ 0.34 | 48.00 $\pm$ 0.02 |
| Mean    | 59.40 $\pm$ 0.05 | 57.20 $\pm$ 0.06 | 57.80 $\pm$ 0.27 | 54.88 $\pm$ 0.03 |

Table 3. Performance of different variants on **CIFAR100**.

| Methods | WSCAT            | WSCAT-fixed      | WSCAT-self       | WSCAT-std        |
|---------|------------------|------------------|------------------|------------------|
| Natural | 55.14 $\pm$ 0.52 | 55.09 $\pm$ 0.08 | 54.70 $\pm$ 1.48 | 51.66 $\pm$ 0.18 |
| FGSM    | 28.41 $\pm$ 0.09 | 27.43 $\pm$ 0.35 | 27.55 $\pm$ 0.49 | 25.22 $\pm$ 0.46 |
| PGD     | 25.26 $\pm$ 0.32 | 23.84 $\pm$ 0.36 | 24.08 $\pm$ 0.11 | 21.89 $\pm$ 0.29 |
| CW      | 22.99 $\pm$ 0.41 | 22.65 $\pm$ 0.03 | 22.04 $\pm$ 0.58 | 19.39 $\pm$ 0.40 |
| AA      | 21.82 $\pm$ 0.40 | 21.83 $\pm$ 0.01 | 20.77 $\pm$ 0.72 | 18.70 $\pm$ 0.15 |
| Mean    | 27.43 $\pm$ 0.29 | 26.97 $\pm$ 0.02 | 26.36 $\pm$ 0.44 | 23.83 $\pm$ 0.05 |

Table 4. Performance of different variants on **ImageNet32-100**.

| Methods | WSCAT            | WSCAT-fixed      | WSCAT-self       | WSCAT-std        |
|---------|------------------|------------------|------------------|------------------|
| Natural | 34.64 $\pm$ 2.76 | 33.28 $\pm$ 0.00 | 32.32 $\pm$ 0.00 | 31.43 $\pm$ 0.11 |
| FGSM    | 12.63 $\pm$ 0.13 | 12.54 $\pm$ 0.00 | 12.62 $\pm$ 0.00 | 8.61 $\pm$ 0.19  |
| PGD     | 9.89 $\pm$ 0.35  | 9.94 $\pm$ 0.00  | 9.80 $\pm$ 0.00  | 6.90 $\pm$ 0.20  |
| CW      | 8.01 $\pm$ 0.37  | 8.02 $\pm$ 0.00  | 8.06 $\pm$ 0.00  | 5.11 $\pm$ 0.23  |
| AA      | 7.27 $\pm$ 0.33  | 7.14 $\pm$ 0.00  | 7.06 $\pm$ 0.00  | 4.61 $\pm$ 0.23  |
| Mean    | 10.59 $\pm$ 0.32 | 10.52 $\pm$ 0.00 | 10.46 $\pm$ 0.00 | 7.09 $\pm$ 0.27  |

Table 5. Epoch time of WSCAT and RST.

| Datasets | CIFAR10 | CIFAR100 | ImageNet32-100 |
|----------|---------|----------|----------------|
| WSCAT    | 5'15"   | 5'18"    | 13'02"         |
| RST      | 5'14"   | 5'18"    | 13'20"         |
